# Supplementary material
Source: PubMed Central journal article supplement (PMC2796241)
Supplement: NIHMS162751-supplement-1_si_001.pdf [file NIHMS162751-supplement-1_si_001.pdf]

Supplementary Information for  
TRANSPLATIN-CONJUGATED TRIPLEX-FORMING OLIGONUCLEOTIDES  
FORM ADDUCTS WITH BOTH STRANDS OF DNA

Meghan A. Campbell and Paul S. Miller

Department of Biochemistry and Molecular Biology

Johns Hopkins Bloomberg School of Public Health

615 North Wolfe Street

Baltimore, MD 21205

Contents:

Figure S1 - Purification of **t2d** by SAX HPLC

Figure S2 - Purification of **t3d** by SAX HPLC

Figure S3 - Melting curves of triplexes formed by deoxyribo- and 2'-O-methylribo-TFOs

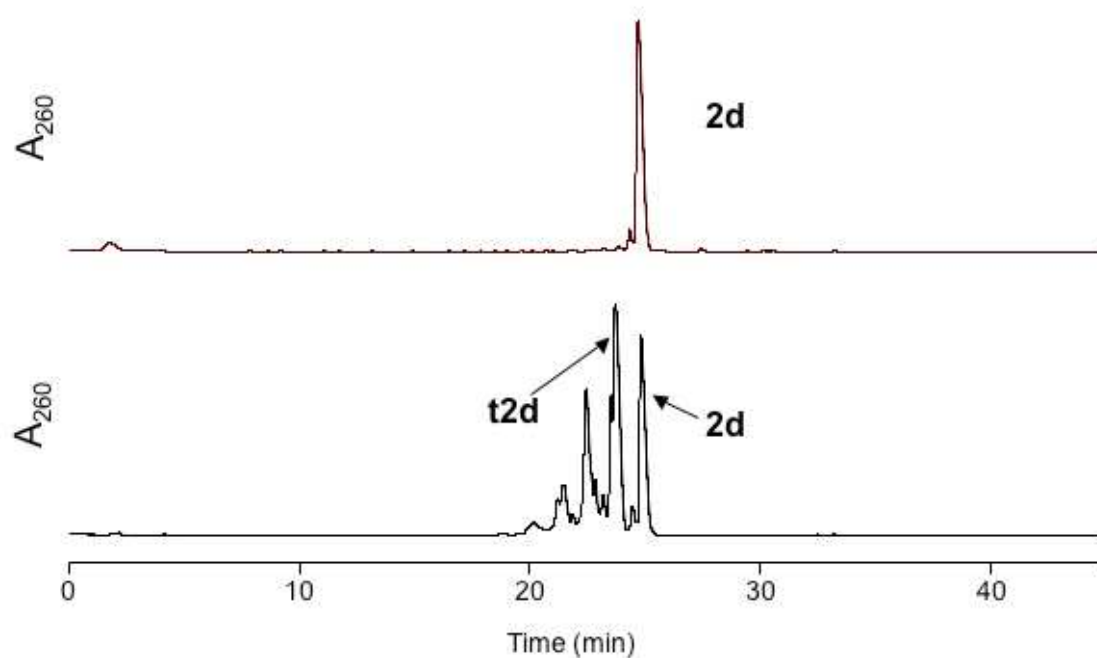

Figure S1 *Purification of t2d by SAX HPLC.* TFO **2d** was incubated with 72  $\mu$ M *trans*-diamminediaquaplatinum(II) dinitrate for 3h at 37°C. The upper chromatogram shows **2d** before platination and the lower chromatogram shows platination reaction mixture. The peak labeled **t2d** was isolated, desalted, and analyzed by MALDI-TOF mass spectrometry. The SAX HPLC column was eluted with a 30 min linear gradient of 0 to 0.5 M NaCl in solution containing 0.1 M Tris, pH 7.8 and 10% acetonitrile at a flow rate of 1.0 mL/min.

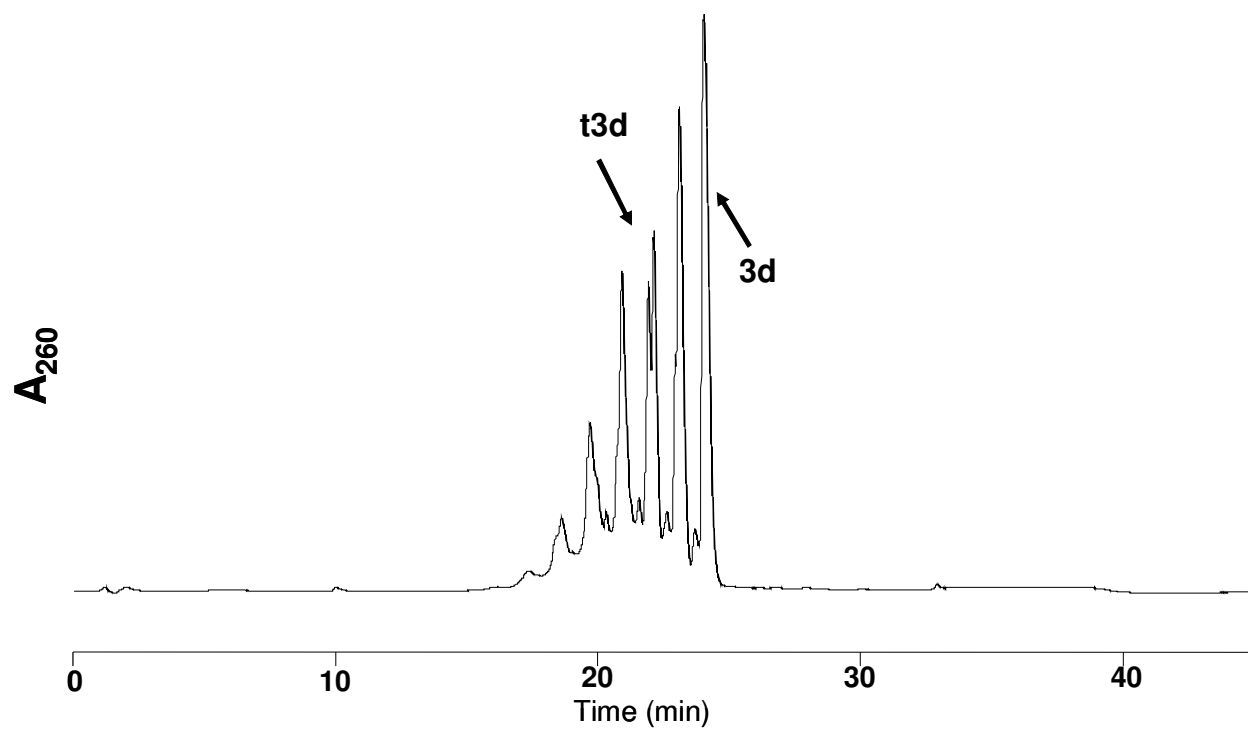

Figure S2 *Purification of **t3d** by SAX HPLC.* TFO **3d** was incubated with 144  $\mu\text{M}$  *trans*-diamminediaquaplatinum(II) dinitrate for 2h at 37°C. The peak labeled **t3d** was isolated, desalted, and analyzed by MALDI-TOF mass spectrometry. The SAX HPLC column was eluted with a 30 min linear gradient of 0 to 0.5 M NaCl in solution containing 0.1 M Tris, pH 7.8 and 10% acetonitrile at a flow rate of 1.0 mL/min

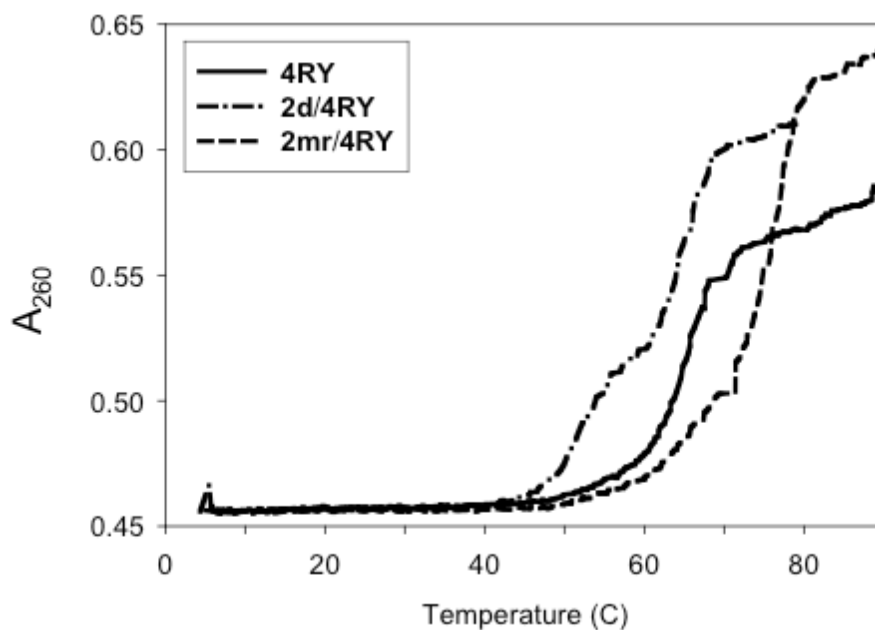

Figure S3 Melting curves of triplexes formed by deoxyribo- and 2'-O-methylribo-TFOs.

Absorbance versus temperature profiles were recorded for solutions containing 1  $\mu$ M deoxyribo-TFO **2d** and 1  $\mu$ M **4RY**, 1  $\mu$ M 2'-O-methylribo-TFO **2mr** and 1  $\mu$ M **4RY**, or 1  $\mu$ M **4RY** alone in pH6.5 triplex buffer. In the case of the **2d/4RY** triplex, the first transition corresponds to dissociation of the TFO from the triplex and the second transition corresponds to dissociation of duplex **4RY**. The single transition observed for triplex **2mr/4RY** indicates that all three strands dissociate simultaneously at a temperature above the melting temperature of the duplex **4RY**.
